# Supplementary material for: Diabetes and respiratory diseases as comorbid conditions in COVID-19 patients from Kazakhstan: a retrospective pilot study
Source: PeerJ. 2025 Dec 16;13:e20413. doi: 10.7717/peerj.20413 (PMC12716145; doi:10.7717/peerj.20413)
Supplement: Supplemental Information 1 — Each row corresponds to one adult patient hospitalized with laboratory-confirmed COVID-19 in 2021–2022 at a multidisciplinary hospital in Almaty, Kazakhstan (N=292). The dataset contains coded variables for age group, sex, nationality, marital status, diabetes (DM_code), pneumonia, chronic bronchial disease, and in-hospital vital status/discharge outcome; all personal identifiers have been removed. Data were extracted and analyzed in September–December 2023. The data support all bivariable and multivariable regression models presented in the article. [file peerj-13-20413-s001.xlsx]

## Sheet: Sheet2
Age code	Alive-1 Dead-2	Sex code (Male 1, Female 2)	Nationality Code (1. Kazakh (-shka) 2. Russian 3. Korean (-yanka) 4. Others (write in)) "	Marital status code (Single 1, Married 2, Divorced 3)	DM_code(1yes,2no)	Pneumonia code(1yes,2no)	Chronic bronch disease code (1yes,2no)	Exodus COVID-19 CODE
2	1	2	1		2	2	2
1	1	2	1		2	2	2	1
5	1	2	1		2	2	2
3	1	2	1	1	2	2	2
3	1	1	1		2	2	2
3	1	1	1		2	2	2
3	1	2	1		2	2	2
2	1	2	1		2	2	2	1
	1	1	1		1	2	2	2
	1	2	1		2	2	2	1
2	1	1	2		2	2	2
3	1	1	1		2	2	2
4	1	2	2		2	2	2
	1	1	2		2	2	2	2
1	1	1	2		2	2	2
3	1	2	4		2	2	2
	1	1	2		2	2	2	2
4	1	1	2		2	2	2
1	1	1	2		2	2	2
2	1	2	1		2	2	2
1	1	2	4		2	2	2
2	1	2	1		2	2	2
	1	1	2		2	2	1	2
2	1	1	1		2	2	2	5
2	1	2	1		2	2	2
2	1	1	1		2	2	2
	1	2	2		1	2	2	2
2	1	1	1		2	2	2	5
2	1	2	1		2	2	2
2	1	2	1		2	2	2
	1	2	4		2	2	2	5
1	1	1	2		2	2	2
1	1	2	1		2	2	2	5
4	1	1	1		2	2	2
2	1	2	1		2	2	2	5
2	1	2	1		2	2	2
4	1	2	4		2	2	2	2
4	1	2	2		2	2	2
2	1	1	2		2	2	2
3	1	1	3		2	2	2
2	1	2	1		2	2	2
3	1	1	1		2	2	2
3	1	2	1		2	2	2
2	1	2	2		2	2	2
2	1	2	1		2	2	2
1	1	2	4		2	2	2
4	1	2	4		2	2	2
1	1	1	1		2	2	2	5
	1	1	2		2	2	2	5
1	1	1	1		2	2	2	5
	1	2	4		2	2	2	5
	1	2	1		2	2	2	5
	1	1	2		2	2	1	5
	1	1	4		2	2	1	2
	1	2	2		2	2	2	5
	1	2	1		2	2	2	5
	1	2	4		2	2	2	5
1	1	2	1		2	2	2
2	1	2	1		2	2	2
1	1	1	1		2	2	2
2	1	2	1		2	2	2
2	1	2	1		2	2	2
1	1	1	1		2	2	2
4	1	2	1		2	2	2
1	1	1	1		2	2	2
	1	2	1		2	2	2
2	1	1	1		2	2	2
2	1	1	1		2	2	2	5
1	1	2	1		2	2	2	5
2	1	1	1		2	2	2	5
2	1	2	1		2	2	2	5
	1	2	4		2	2	2	5
2	1	2	1		2	2	2	5
	1	1	2		2	2	2	5
	1	2	2		2	2	2	5
3	1	2	1		2	2	2	5
	1	1	4		1	2	2	5
3	1	2	2		2	2	2	5
	1	2	1		1	2	2	5
1	1	1	1		2	2	2	5
2	1	2	1		2	2	2	5
	1	1	4		1	2	2	5
	1	2	1		2	2	2	5
	1	2	1		1	2	2	5
	1	2	2		1	2	2	5
	1	2	1		2	2	2	5
	1	1	2		2	2	2	5
1	1	2	1		2	2	2	5
	1	1	4		2	2	2	5
	1	1	1		2	2	2
	1	1	1		2	2
	1	2	1		2	1	2
	1	2	2		2	1	2
	1	2	4		2	2	2
	1	1	1		2	1	2
	1	2	1		2	1	2
	1	2	2		2	2	2
	1	2	2		2	2	2
	1	2	2		2	2	2
	1	1	2		2	2	2
	1	2	2		2	2	2
	1	2	2		2	2	2
	1	1	1		2	1	2
	1	1	1		2	1	2
	1	2	1		2	1	2
	1	2	1		2	1	2
	1	2	1		2	1	2
	1	2	1		2	2	2
	1	2	1		2	2	2
	1	2	1		2	1	2
	1	2	1		2	1	2
	1	2	1		2	2	2
					2	2	2
	2	2	1		2	2	2
	2	1	1		2	2	2
	2	1	1		2	2	2
	2	1	1		2	2	2
	2	2	1		2	2	2
	2	2	1		2	2	2
	2	2	1		1	2	2
	2	1	4		1	2	2
	2	1	1		2	2	2
	2	2	1		2	2	2
3	2	1	1		2	2	2
	2	2	1		2	2	2
	2	2	4		2	2	2
	2	1	1		2	2	2
	2	1			2	2	2
	2	2	2		2	2	2
	2	2	1			2	2
3	2	2	1		2	2	2
	2	2	4			2	2
2	2	2	4		2	2	2
4	2	2	1		2	2	2
3	2	2	1		2	2	2
2	2	1	1		2	2	2
1	2	1	4		2	2	2
2	2	1			2	2	2
	2	2	1		2	2	2
	2	2	1		1	2	2
2	2	1	1		2	2	2
	2	1			2	1	2
3	2	1	3		2	2	2
	2	1	1		1	2	2
	2	2	1		1	2	2
	2	1	2		1	2	2
	2	1	1			2	2
2	2	1	1		2	2	2
	2	1	1		2	2	2
3	2	2	2		2	2	2
	2	2	4		2	2	2
	2	1	1		2	2	2
2	2	2	1		2	2	2
	2	1	1		1	2	2
	2	2	1		2	2	2
	2	1	1		2	2
	2	2	2		2	2
	2	2	4			2	2
	2	1	1		2	2	2
	2	2	1		2	2	2
	2	1	1			2	2
2	2	1	2		2	2	2
3	2	1	1		2	2	2
	2	2	1			2	2
4	2	2	3		2	2	2
	2	1	2			2	2
3	2	2	1		2	2	2
	2	2	2			2	2
2	2	2	1		2	2	2
	2	2	1		2	2	2
	2	1	1		1	2	2
	2	2	1		2	2	2
	2	1	1			2	2
4	2	2	1		2	2	2
4	2	1	1		2	2	2
	2	1	1		1	2	2
	2	2	1		2	2	2
	2	2	1		1	2	2
	2	1	1		1	2	2
	2	1	1		2	2	2
4	2	2	1		2	2	2
	2	1	1		2	2	1
3	2	1	1		2	2	2
2	2	2	1		2	2	2
	2	2	4		2	2	2
	2	2			1	2	2
	2	2			1	2	2
	2	2				2	2
	2	1				2	2
2	1	1	1		2	2	2	5
3	1	2	1		2	2	2	1
2	1	2			2	2	2
3	1	2			2	2	2
2	1	2			2	2	2
3	1	2			2	2	2
2	1	2			2	2	2
3	1	2			2	2	2
3	1	2			2	2	2
2	1	2			2	2	2
1	1	1			2	2	2
1	1	1	1		2	2	2	1
1	1	2	1		2	2	2	5
1	1	2	1		2	2	2	5
3	1	1	1		2	2	2	5
1	1	1			2	2	2
2	1	2			2	2	2
1	1	2			2	2	2
3	1	1	4		2	2	2	5
2	1	1	1		2	2	2	5
4	1	2	1		2	2	2	5
2	1	2	4		2	2	2	3
1	1	1	1		2	2	2	3
2	1	2	1		2	2	2	3
1	1	1	1		2	2	2	3
3	1	2	1		2	2	2	1
3	1	1	1		2	2	2	3
3	1	1	1		2	2	2	3
3	1	2	2		2	2	2	1
1	1	2	1		2	2	2	1
2	1	2	1		2	2	2	3
2	1	2	1		2	2	2	1
4	1	2	2		2	2	2	1
2	1	2	4		2	2	2	1
3	1	1	1		2	2	2	1
2	1	1	4		2	2	2	1
1	1	2	1		2	2	2	1
4	1	2	1		2	2	2	1
1	1	1	1		2	2	2	1
1	1	1	1		2	2	2	1
4	1	1	1		2	2	2	1
3	1	2	1		2	2	2	1
1	1	1	1		2	2	2	1
	1	1	1		2	2	2	5
	1	2	2		2	2	2	5
	1	2	1		2	2	2	1
4	1	2	1		2	2	2	5
1	1	1	1		2	2	2	5
	1	1	4		2	2	2	5
	1	1	2		2	2	2	5
1	1	1	1		2	2	2	5
	1	2	4		2	2	1	5
1	1	2	1		2	2	2	5
1	1	2	1		2	2	2	5
	1	1	1		2	2	1	5
	1	1	1		2	2	2	5
	1	2	1		2	2	1	5
1	1	2	1		2	2	2	5
1	1	1	1		2	2	2	5
1	1	1	1		2	2	2	5
	1	2	2		2	2	2	5
2	1	2	1		2	2	2	5
	1	1	1		2	2	2	5
	1	1	1		1	2	2	5
	1	2	1		2	2	2	5
1	1	1	1		2	2	2	5
3	1	1	1		2	2	2	5
	1	1	1		1	2	2	5
	1	2	1		1	2	2	5
	1	2	1		1	2	2	5
1	1	2	1		2	2	2	5
	1	1	1	2	2	2	2	5
	1	1	1	2	2	2	2	5
3	1	2	1	3	2	2	2	5
3	1	2	4	3	2	2	2	5
	1	1	1	3	2	2	2	5
	1	1	1	2	2	2	2	5
2	1	1	1	2	2	2	2	5
2	1	2	1	3	2	2	2	5
3	1	2	1	3	2	2	2	5
	1	2	2	3	2	2	1	5
	1	2	1	2	1	2	2	5
	1	1	1	2	1	2	1	5
1	1	2	1	3	2	2	2	5
	1	2	4	3	2	1	2	5
	1	2	2	3	2	2	2	5
1	1	2	1	3	2	2	2	5
1	1	2	1	3	2	2	2	5
	1	1	1	2	2	2	2	5
	1	2	1	3	2	2	2	5
3	1	2	1	3	2	2	2	5
	1	2	1	3	2	2	2	5
	1	1	1	2	2	2	2	5
	1	2	1	3	2	2	2	5
2	1	1			2	2	2
	1	2	1	3	2	2	2	5
2	1	1	1	2	2	2	2	5
1	1	1	1	2	2	2	2	5
	1	1	1	2	2	2	2	5
2	1	2			2	2	2
	1	2	1	3	2	2	2	5
1	1	1	1	1	2	2	2	5

## Sheet: Supplementary File 1. Data Dict
variable_name	variable_label	description/definition	type	units	allowed_values_or_range	coding_notes	non_missing_n	missing_n	missing_pct	unique_values	min	max	example_values	status
Age code	Age group (coded)	Age category code at admission; recode to analysis groups (e.g., 18–44; 45–60; >60) as per manuscript.	float	years (grouped)	Codes: 1, 2, 3, 4, 5	Original codes observed: [1.0, 2.0, 3.0, 4.0, 5.0] — PLEASE PROVIDE exact mapping	153	138	47.42	5	1	5	2.0, 1.0, 5.0, 3.0, 4.0	NEEDS CONFIRMATION
Alive-1 Dead-2	Vital status at discharge	In-hospital outcome status coded as alive or dead at discharge.	float		Codes: 1, 2	1=Alive; 2=Dead	290	1	0.34	2	1	2	1.0, 2.0	CONFIRMED FROM HEADER
Sex code (Male 1, Female 2)	Sex (at admission)	Recorded biological sex at hospital admission.	float		Codes: 1, 2	1=Male; 2=Female	290	1	0.34	2	1	2	2.0, 1.0	CONFIRMED FROM HEADER
Nationality Code (1. Kazakh (-shka) 2. Russian 3. Korean (-yanka) 4. Others (write in)) "	Nationality	Self-reported nationality as recorded in medical records.	float		Codes: 1, 2, 3, 4	1=Kazakh (-shka) 2. Russian 3. Korean (-yanka) 4. Others (write in)	269	22	7.56	4	1	4	1.0, 2.0, 4.0, 3.0	CONFIRMED FROM HEADER
Marital status code (Single 1, Married 2, Married 3)	Marital status	Marital status as recorded in medical records.	float		Codes: 1, 2, 3	1=Single; 2=Married; 3=Divorced	30	261	89.69	3	1	3	1.0, 2.0, 3.0	CHECK HEADER MAPPING
DM_code(1yes,2no)	Diabetes mellitus (any type)	Presence of physician-diagnosed diabetes mellitus at admission or in chart history.	float		Codes: 1, 2	1=Yes; 2=No	280	11	3.78	2	1	2	2.0, 1.0	CONFIRMED FROM HEADER
Pneumonia code(1yes,2no)	Pneumonia (clinical/radiologic)	Pneumonia diagnosis recorded in chart (clinical and/or radiologic).	integer		Codes: 1, 2	1=Yes; 2=No	291	0	0	2	1	2	2, 1	CONFIRMED FROM HEADER
Chronic bronch disease code (1yes,2no)	Chronic bronchial disease	Chronic bronchial/respiratory disease as recorded (e.g., chronic bronchitis/COPD).	float		Codes: 1, 2	1=Yes; 2=No	288	3	1.03	2	1	2	2.0, 1.0	CONFIRMED FROM HEADER
Exodus COVID-19 CODE	COVID-19 discharge outcome (coded)	COVID-19 clinical outcome at discharge, coded in the hospital EMR. Provide full mapping per CRF.	float		Codes: 1, 2, 3, 5	Observed codes: [1.0, 2.0, 3.0, 5.0] — PLEASE PROVIDE mapping	134	157	53.95	4	1	5	1.0, 2.0, 5.0, 3.0	NEEDS CONFIRMATION
